# Supplementary material for: Moxifloxacin Metal Complexes: Synthesis, Characterisation, Antimicrobial and Antidiabetic Activities with Docking Studies
Source: Hindawi journal article supplement (doi:10.1155/2023/3754561), 2023-01-03
Supplement: f1 [file 3754561.f1.docx]

Supplementary Material


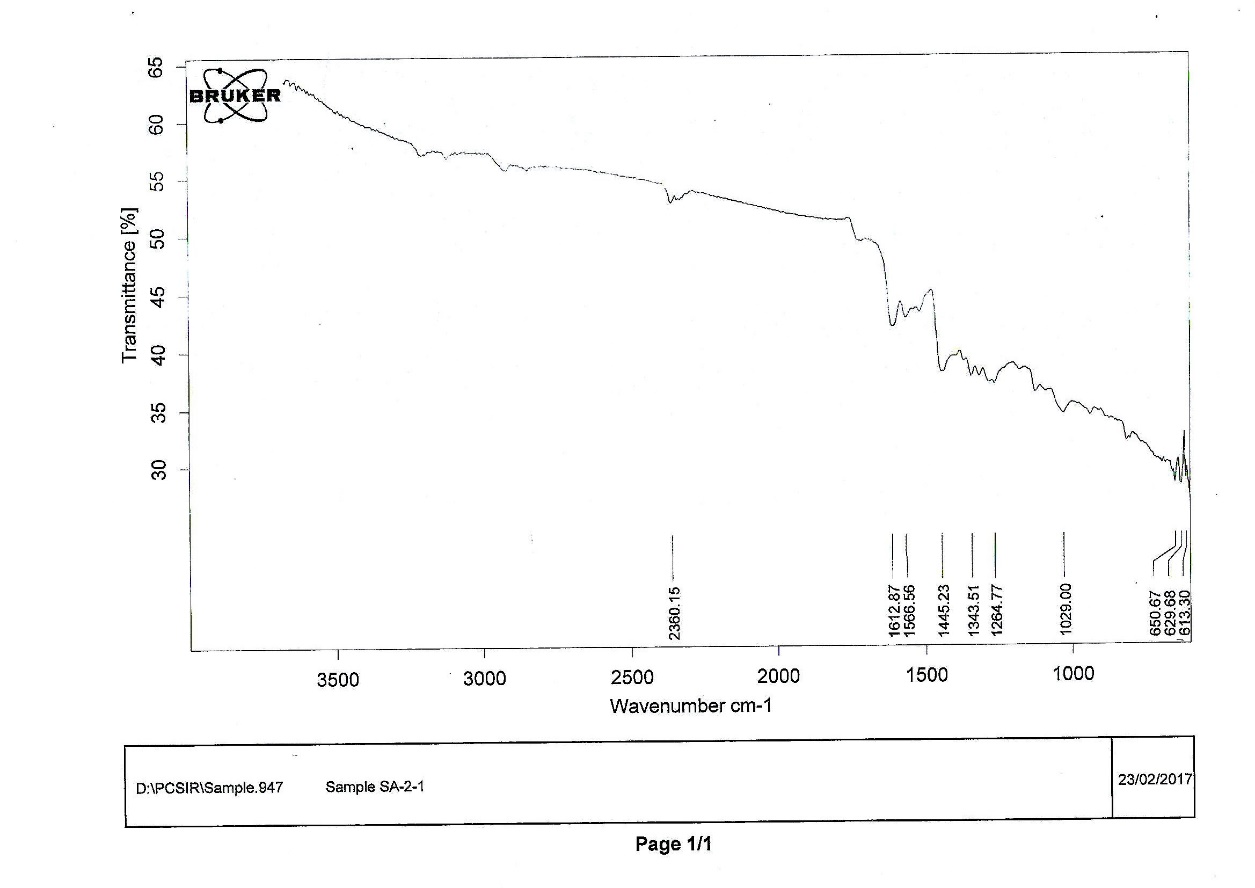


Figure S1a; FTIR spectra of complexes 1


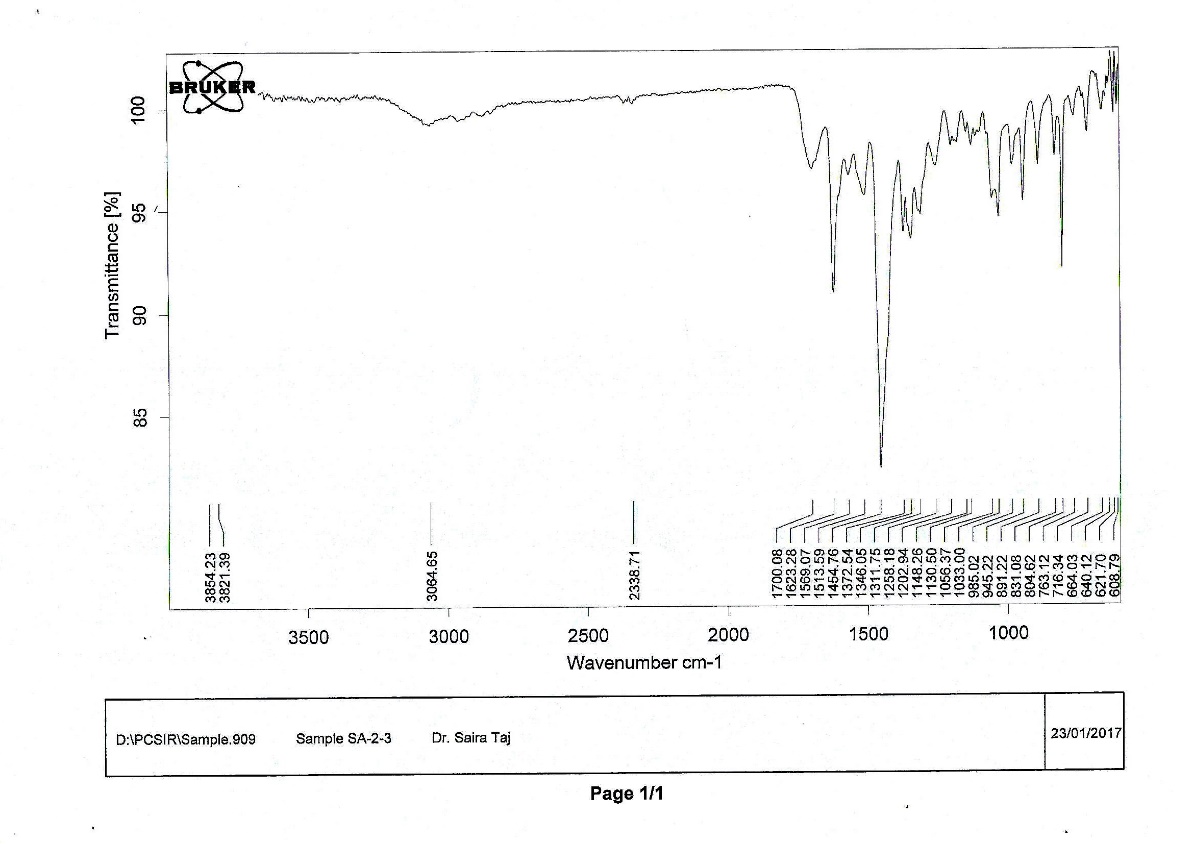


Figure S1b; FTIR spectra of complexes 2


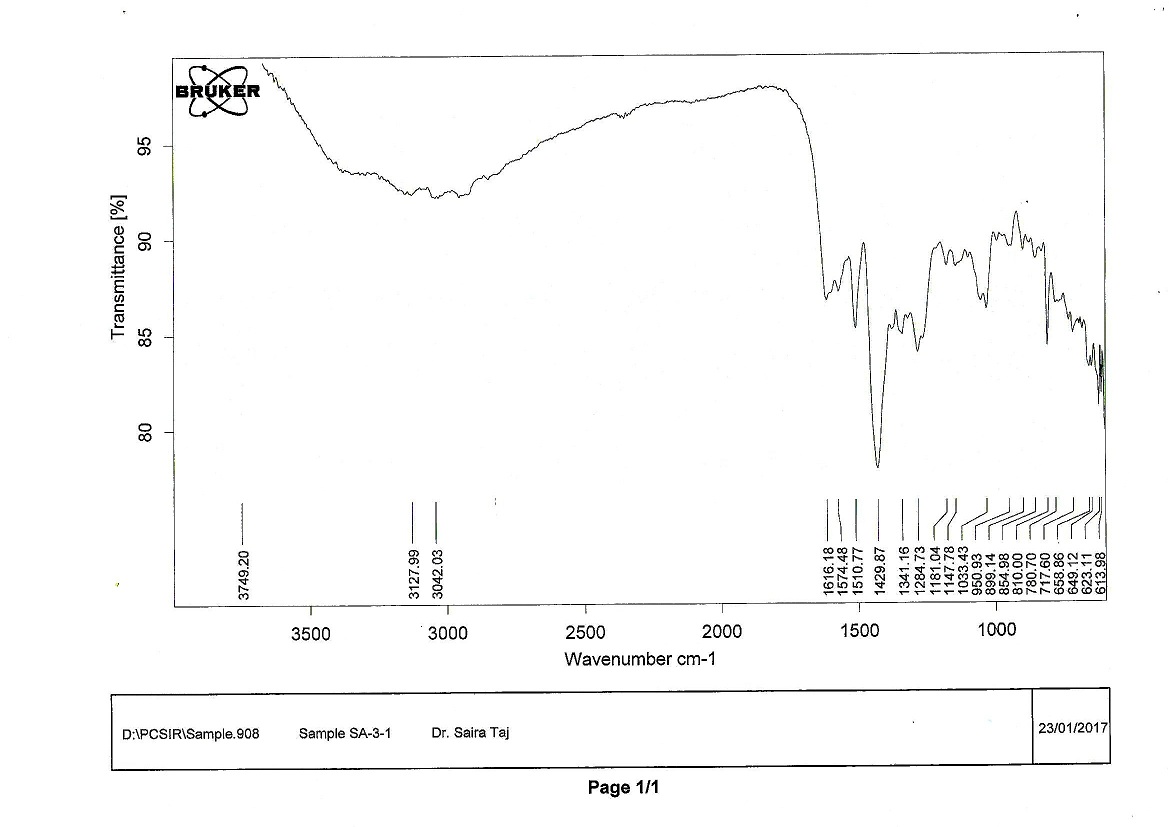


Figure S1c; FTIR spectra of complexes 3


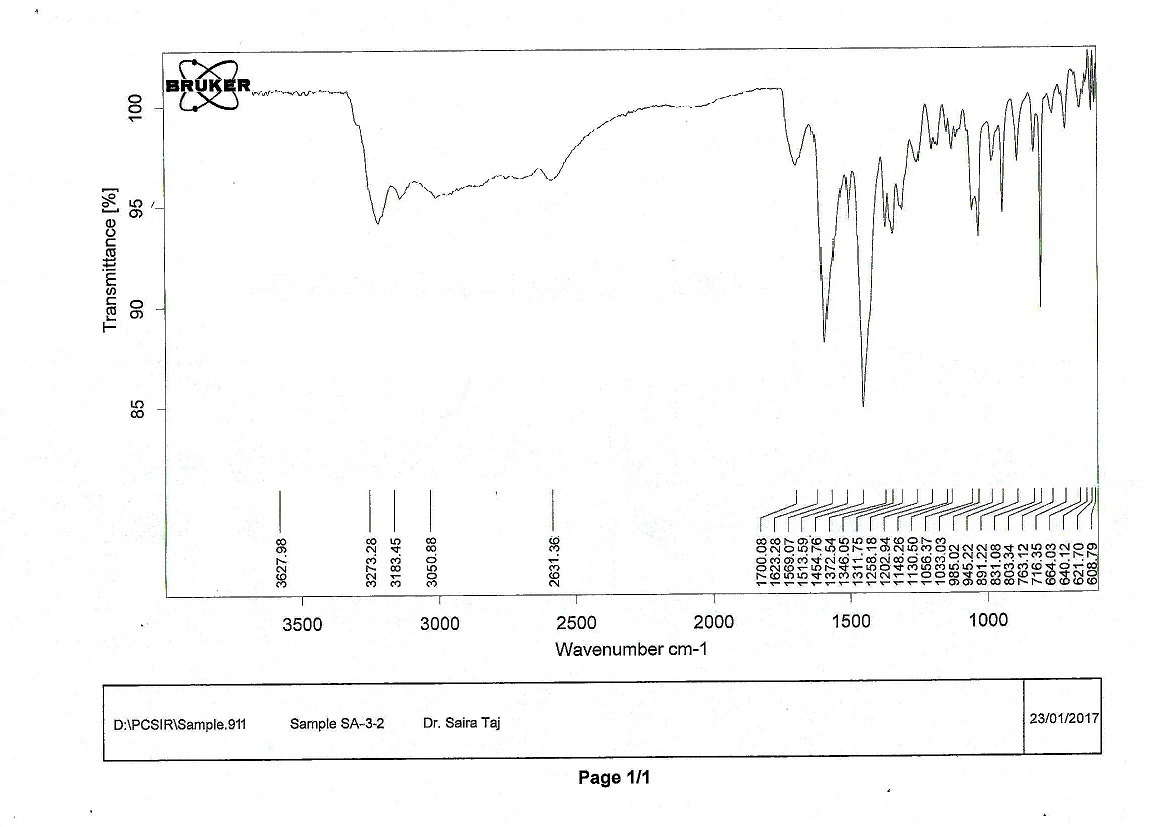


Figure S1d; FTIR spectra of complexes 4


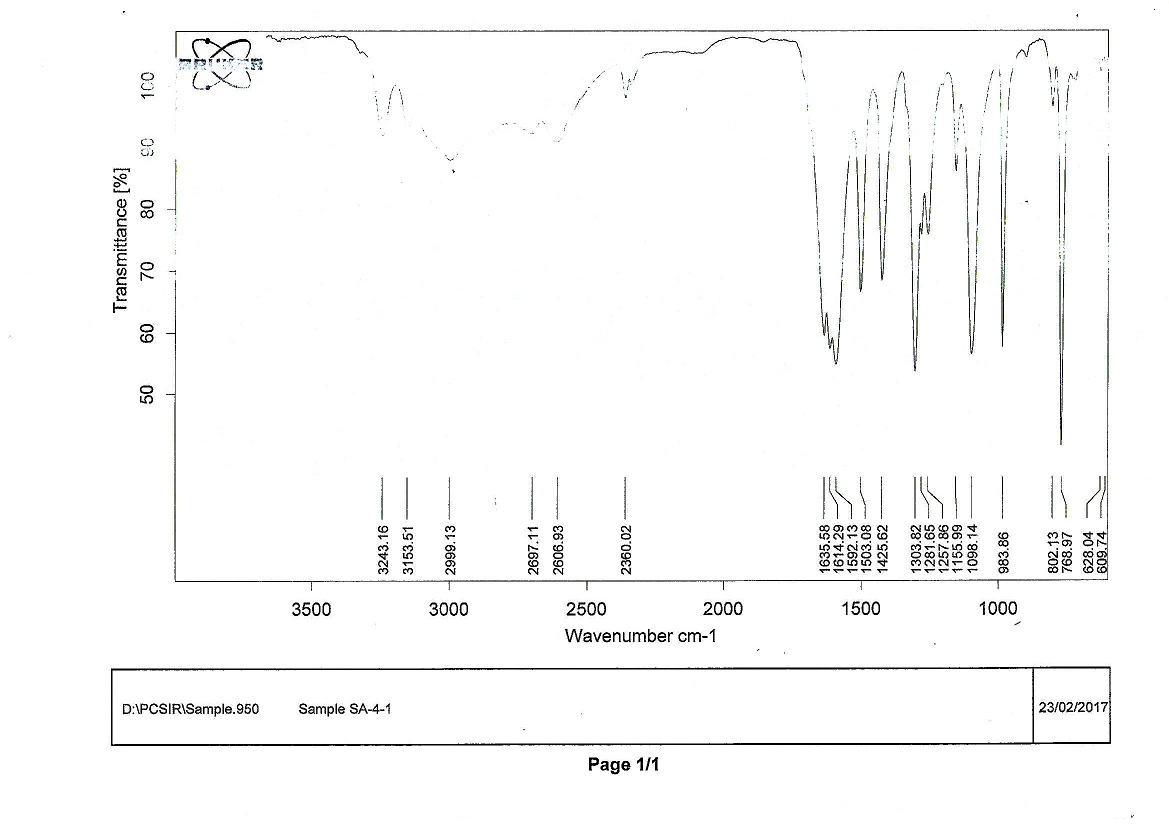


Figure S1e; FTIR spectra of complexes 5


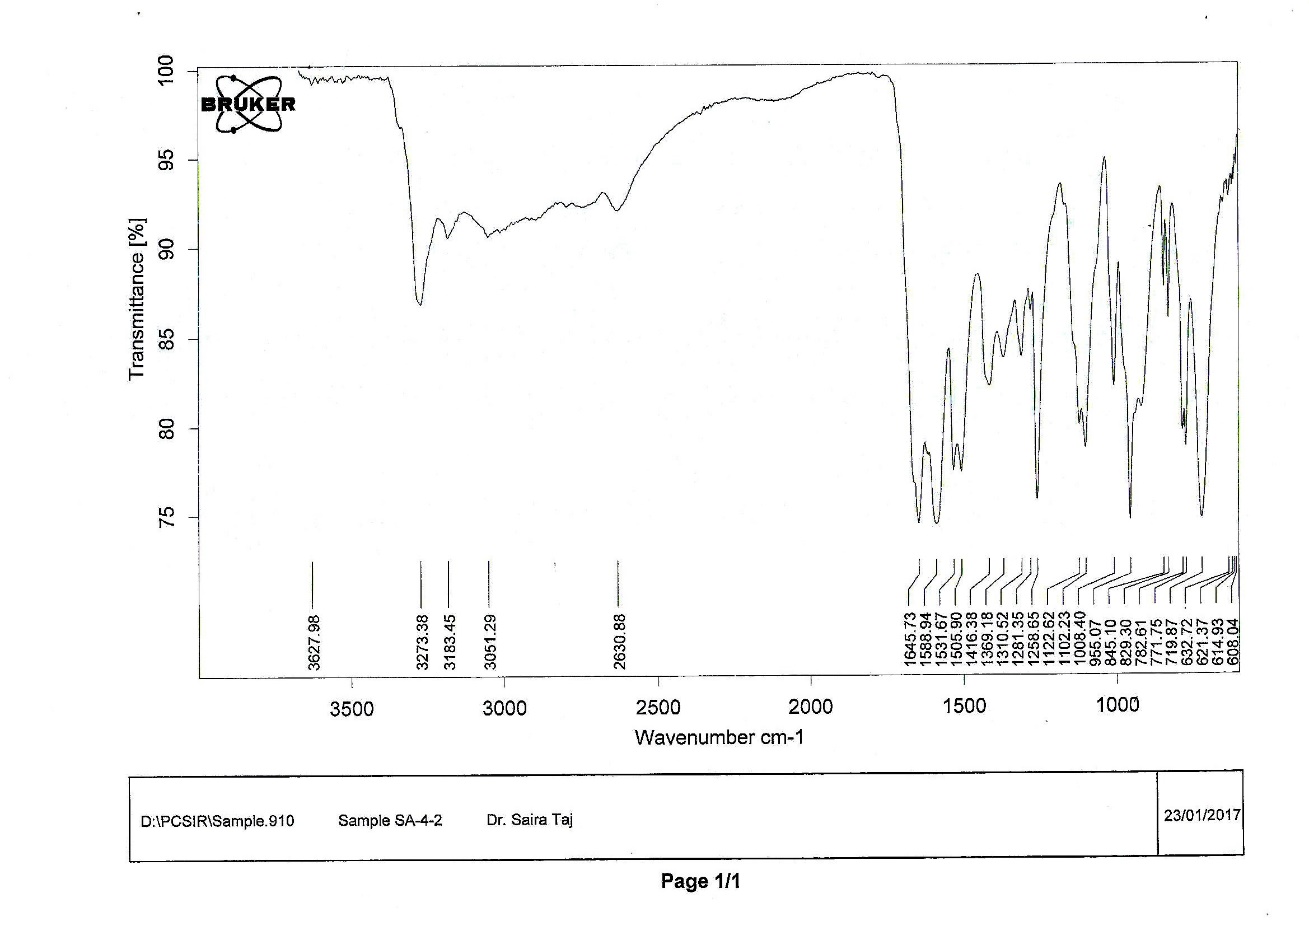


Figure S1f; FTIR spectra of complexes 6


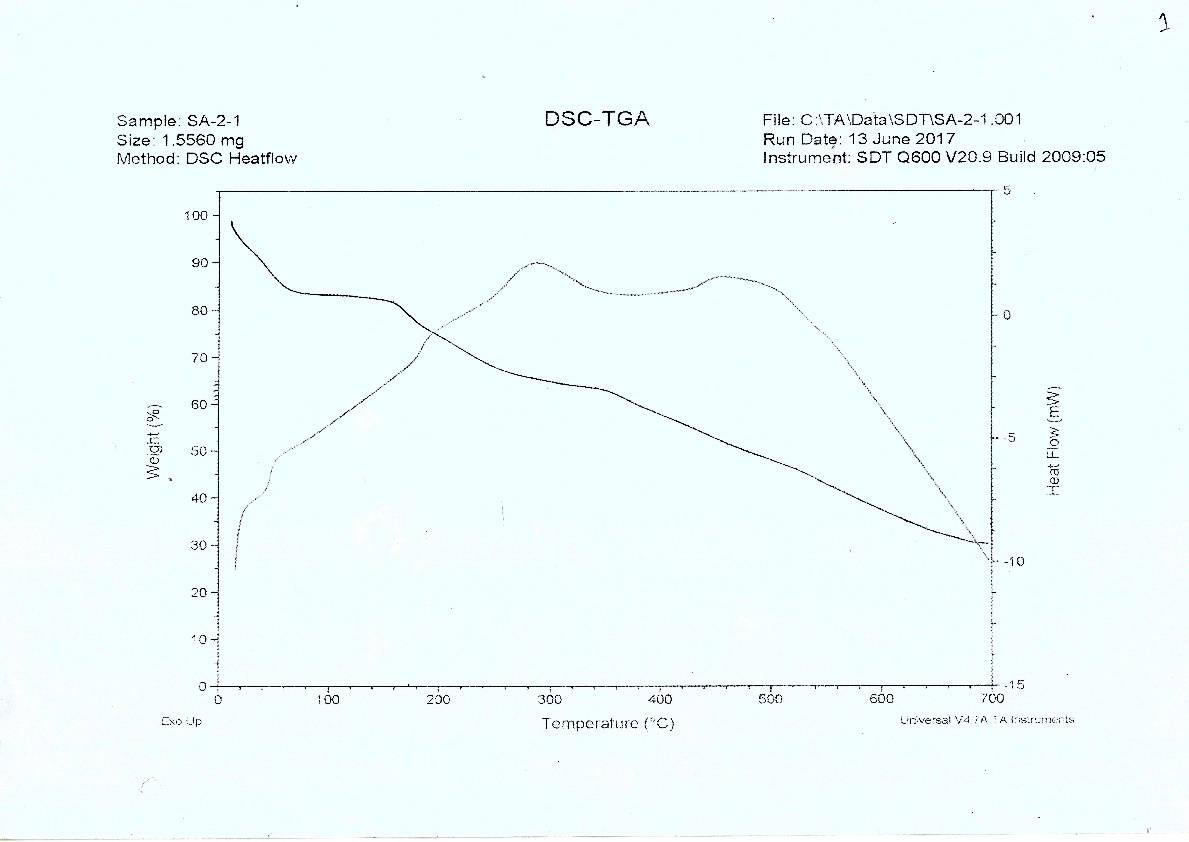


Figure S2a; TGA thermographs for complexes1


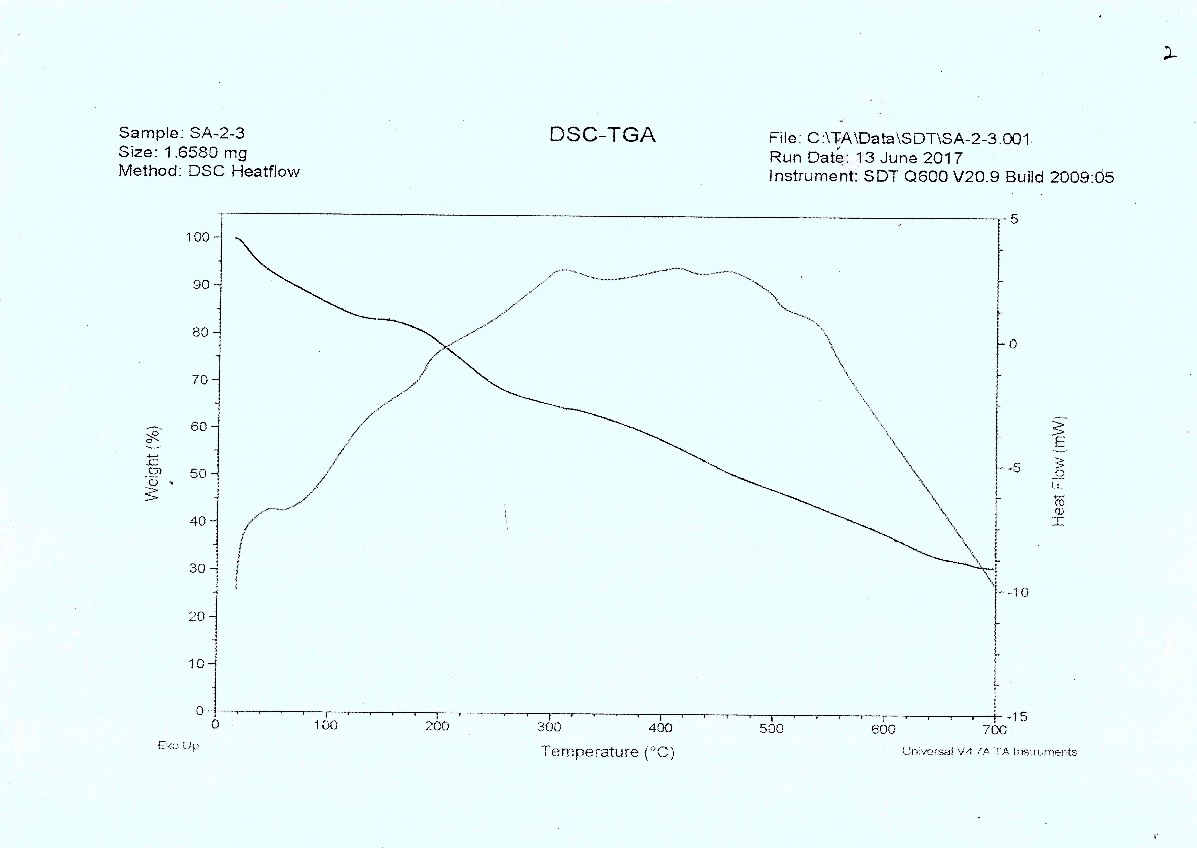


Figure S2b; TGA thermographs for complexes2


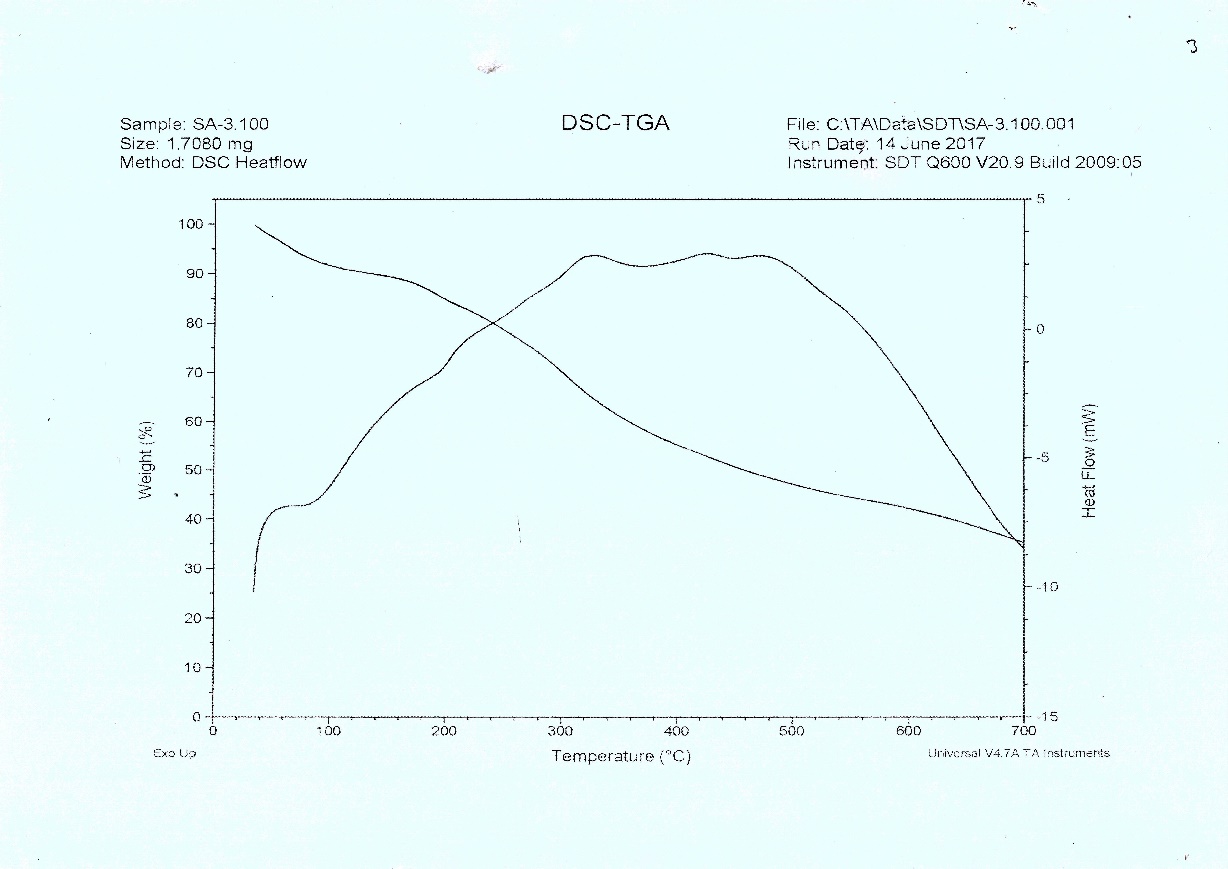


Figure S2c; TGA thermographs for complexes3


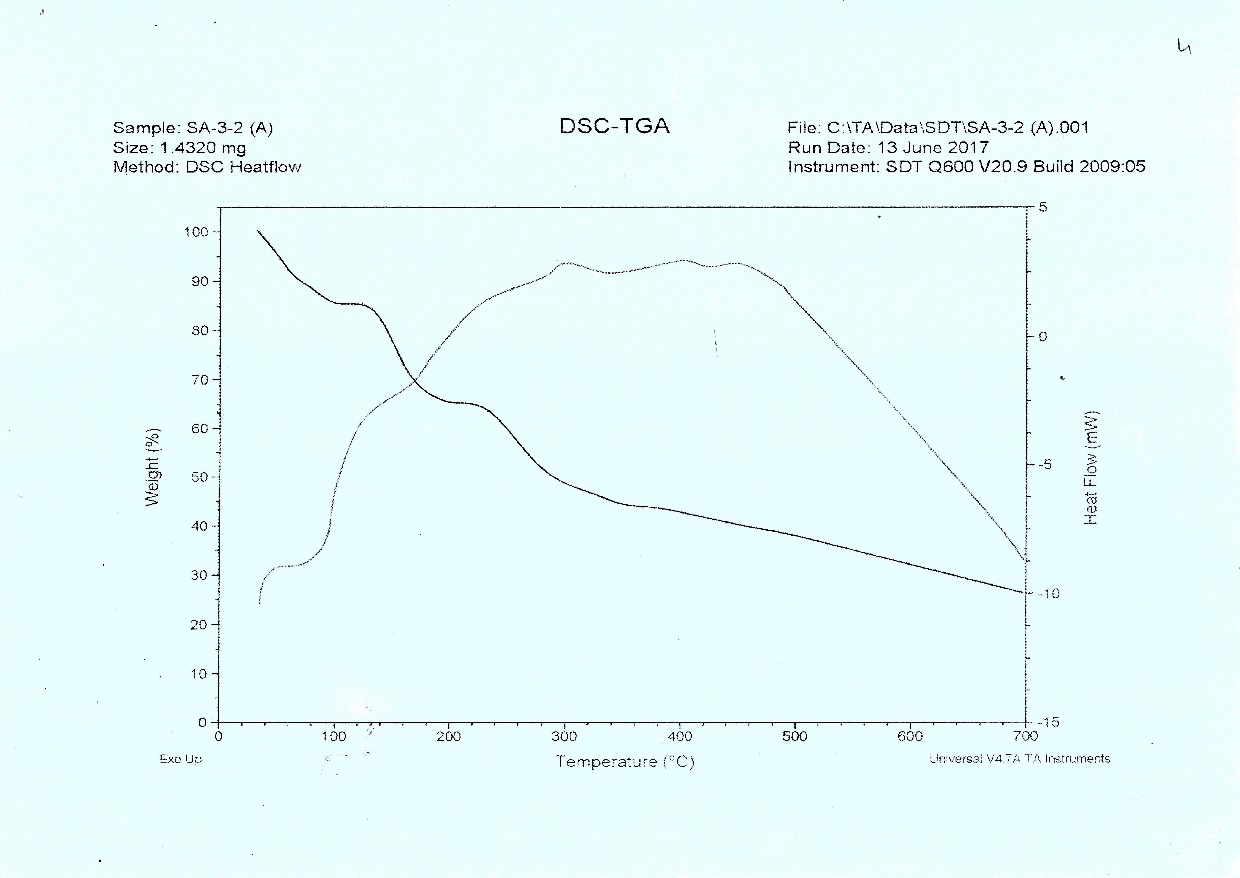


Figure S2d; TGA thermographs for complexes4


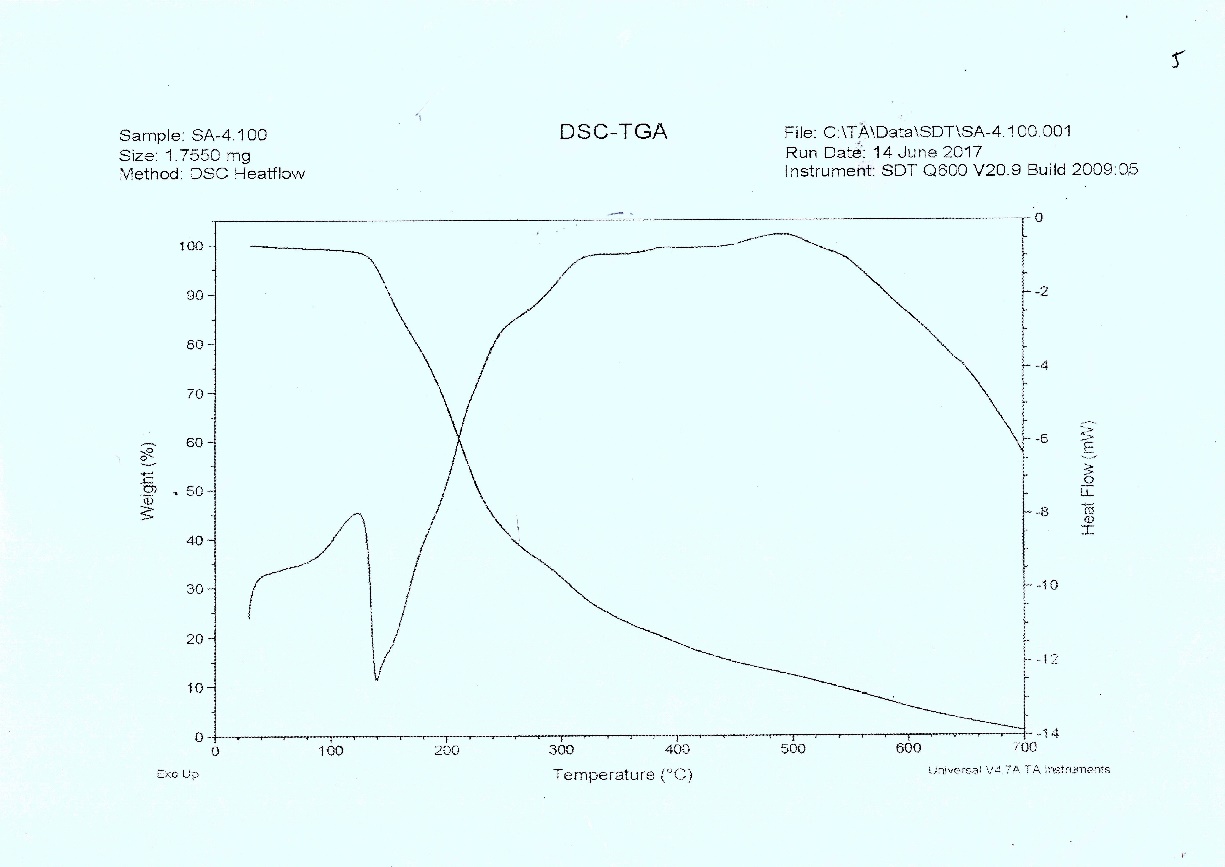


Figure S2e; TGA thermographs for complexes5


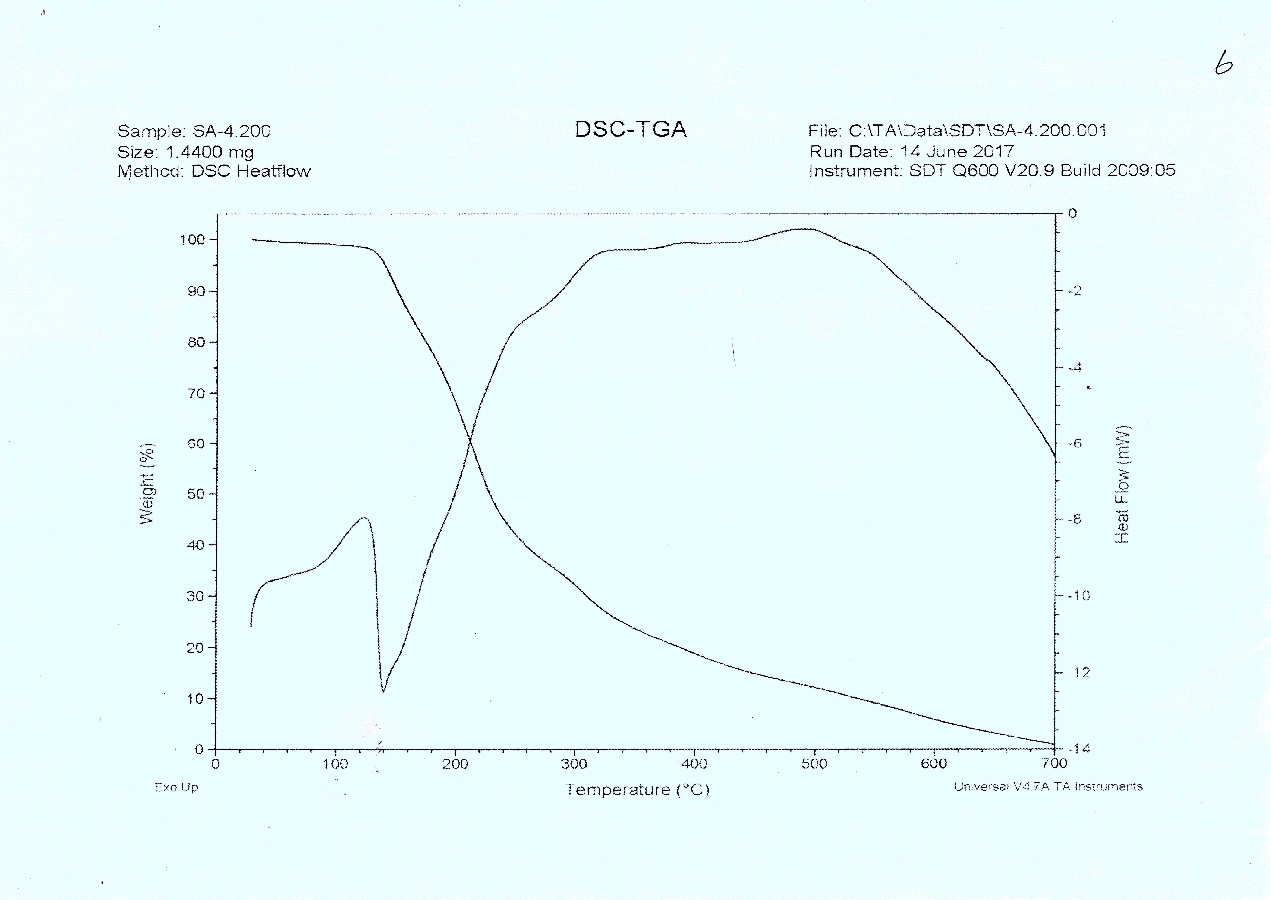


Figure S2f; TGA thermographs for complexes6


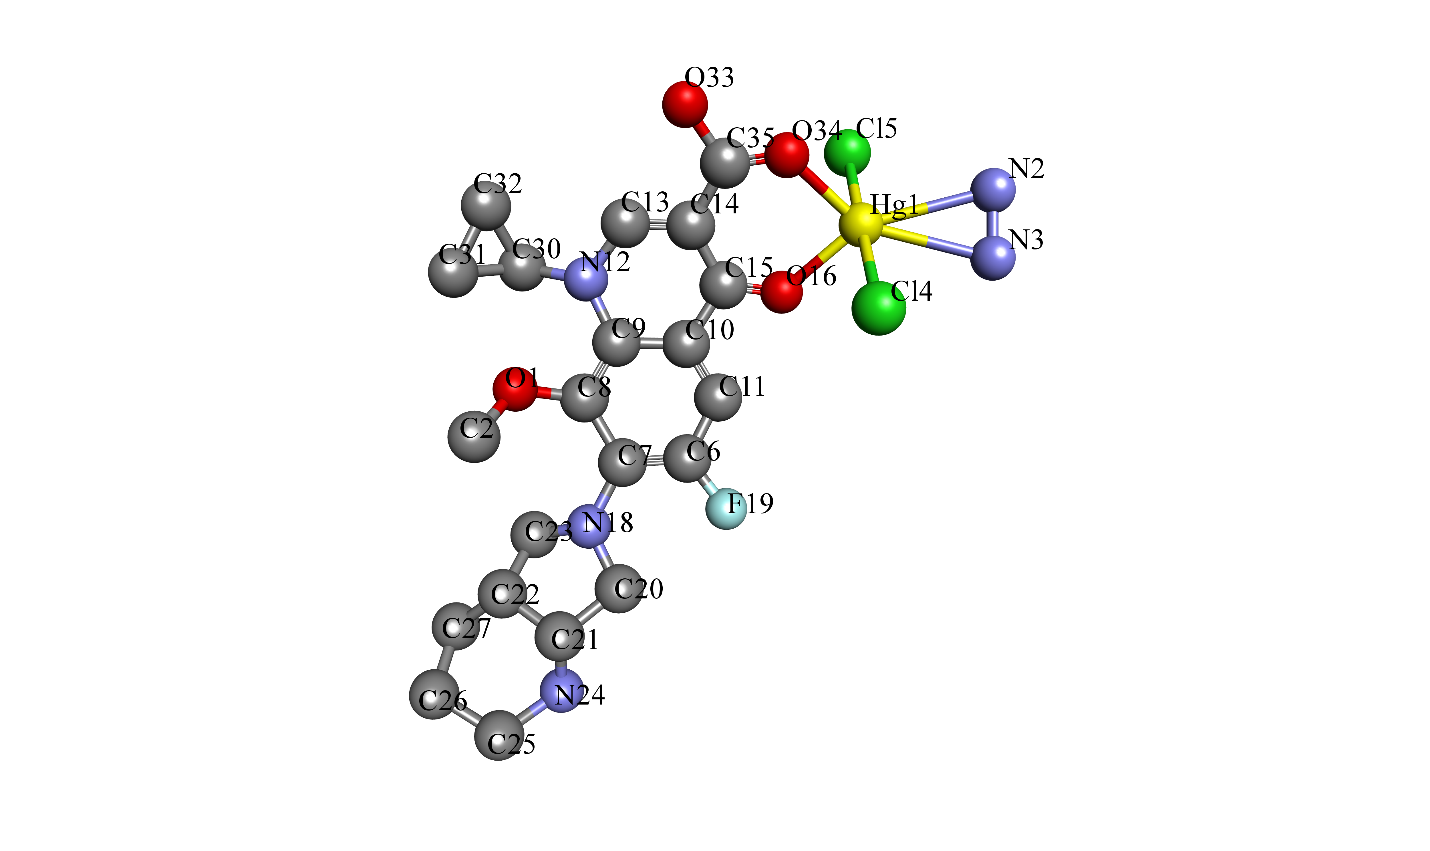


Figures S3a; Molecular structures with optimized geometry for complex 1

(The hydrogen atoms are omitted for simplicity)


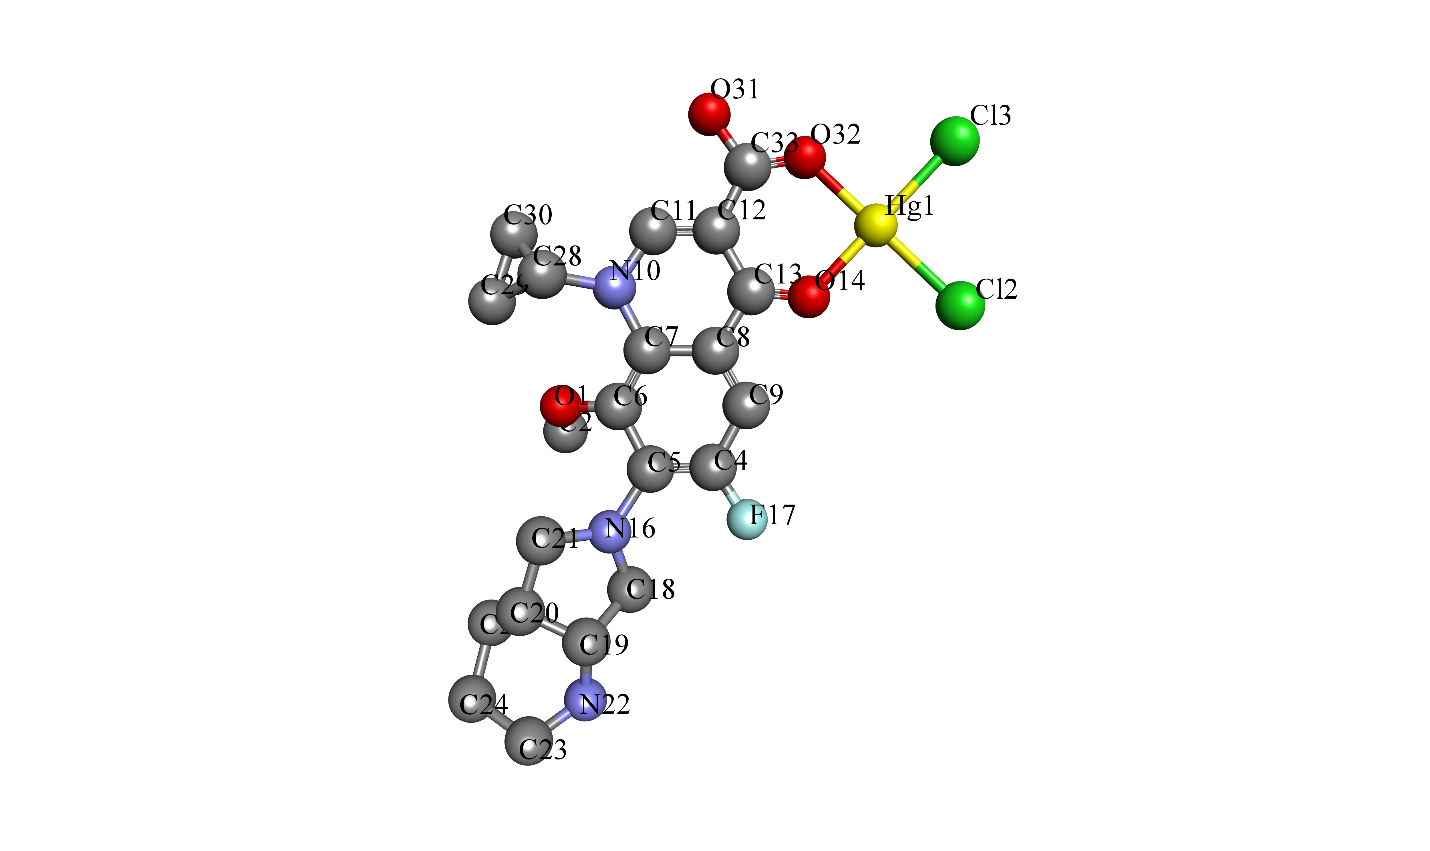


Figures S3b; Molecular structures with optimized geometry for complex 2

(The hydrogen atoms are omitted for simplicity)


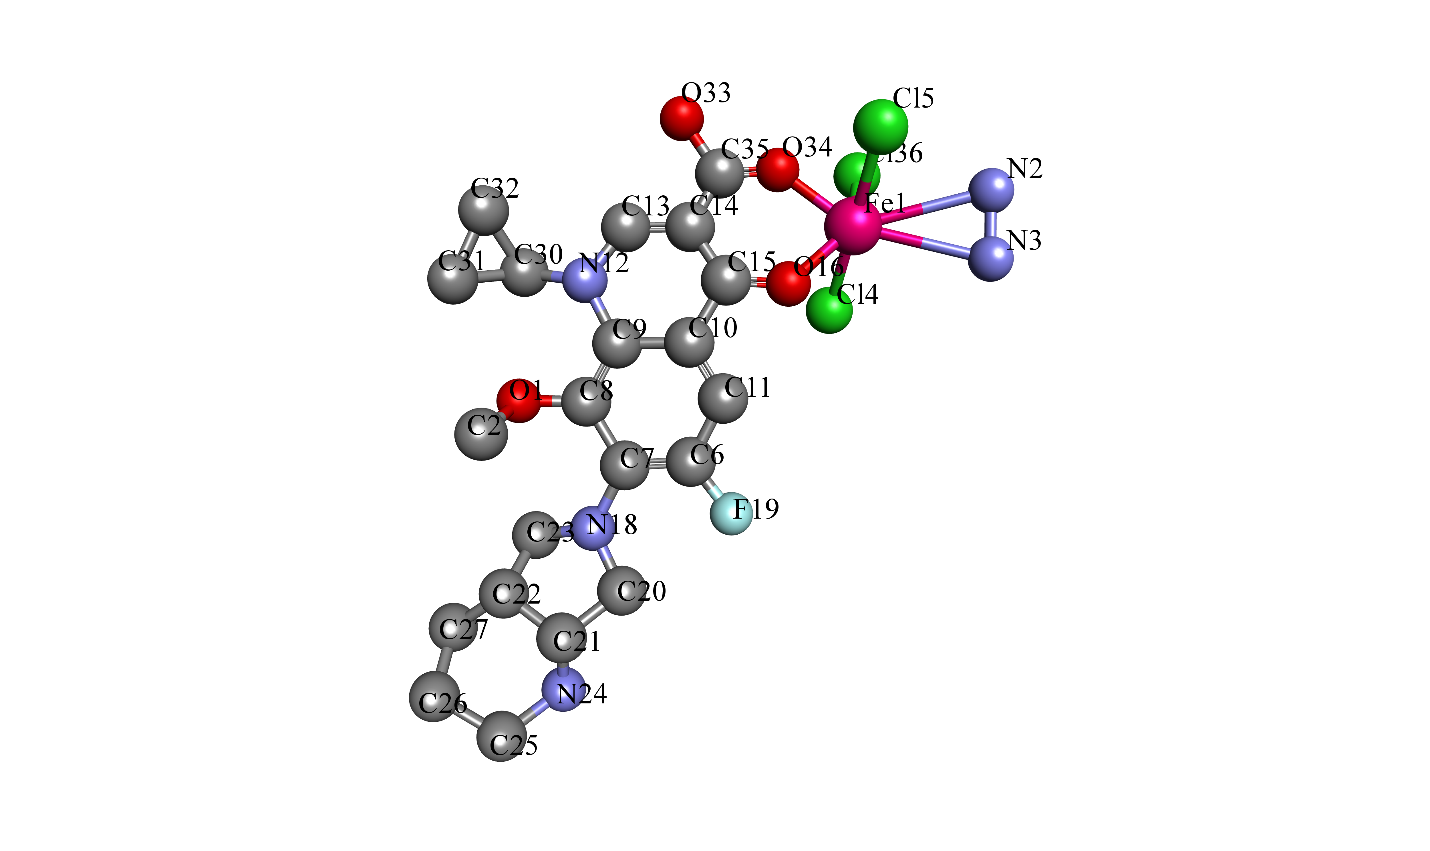


Figures S3c; Molecular structures with optimized geometry for complex 3

(The hydrogen atoms are omitted for simplicity)


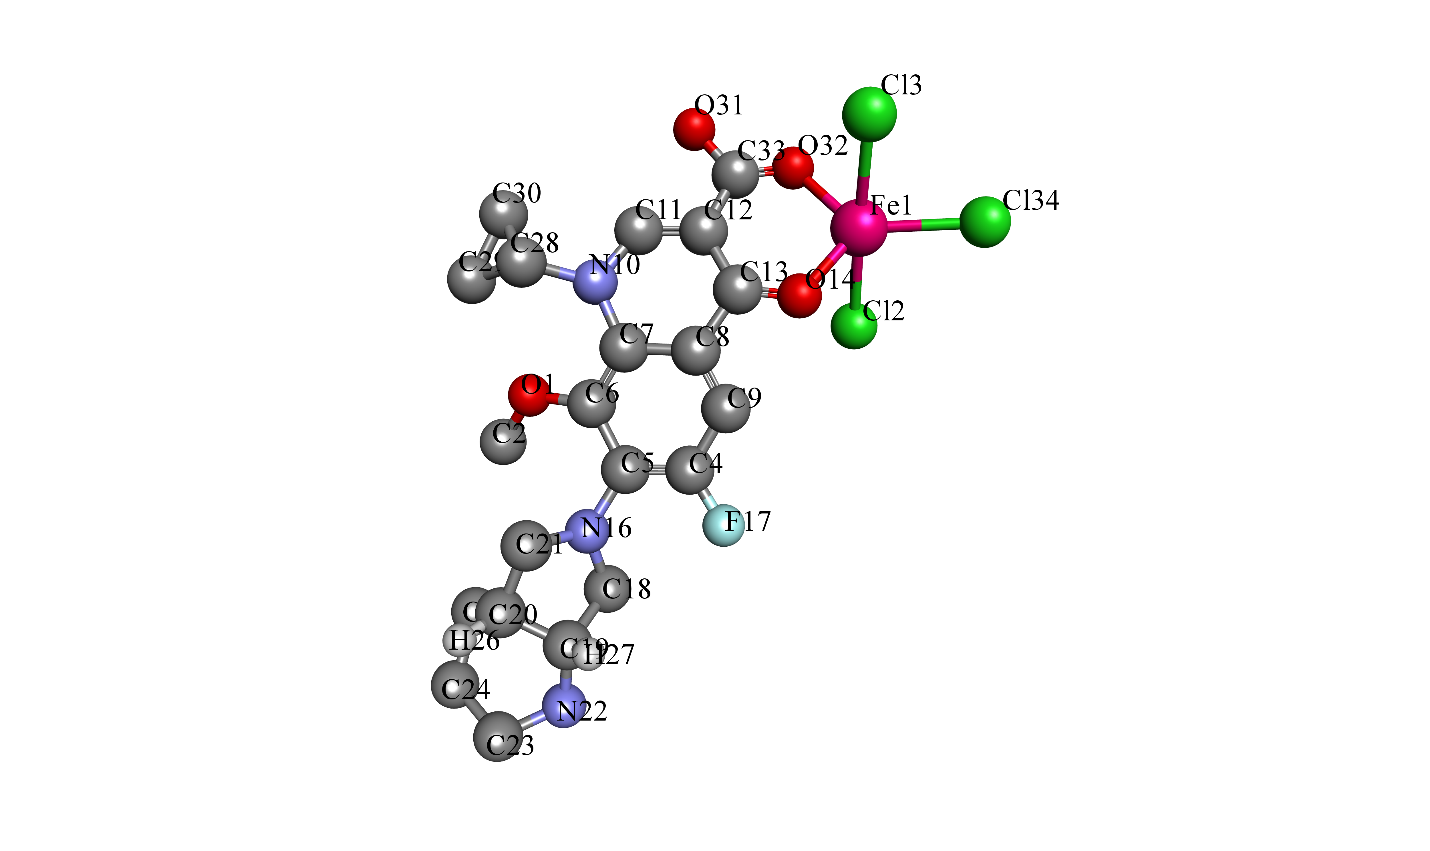


Figures S3d; Molecular structures with optimized geometry for complex 4

(The hydrogen atoms are omitted for simplicity)


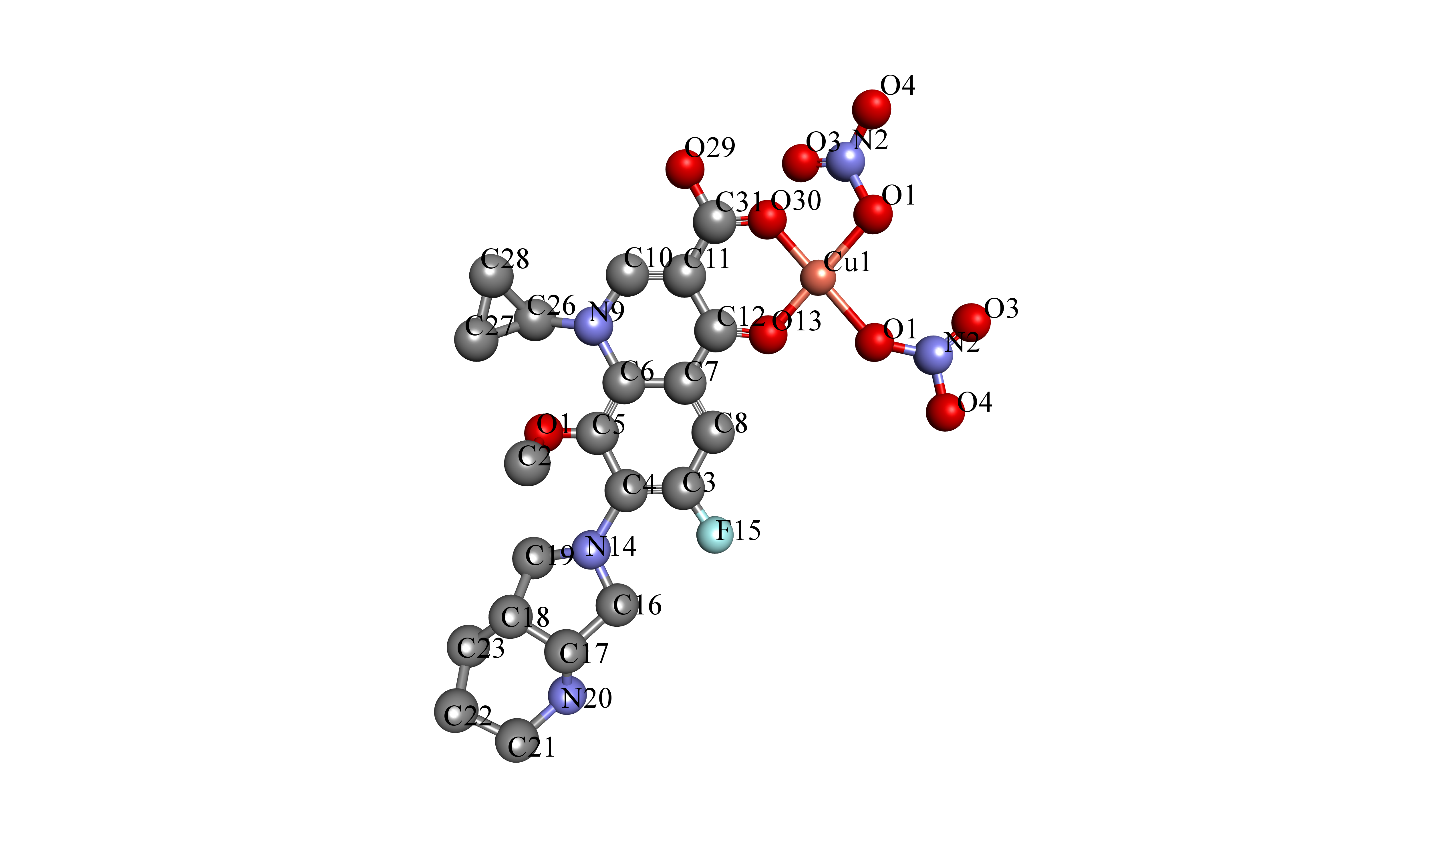


Figures S3e; Molecular structures with optimized geometry for complex 5

(The hydrogen atoms are omitted for simplicity)


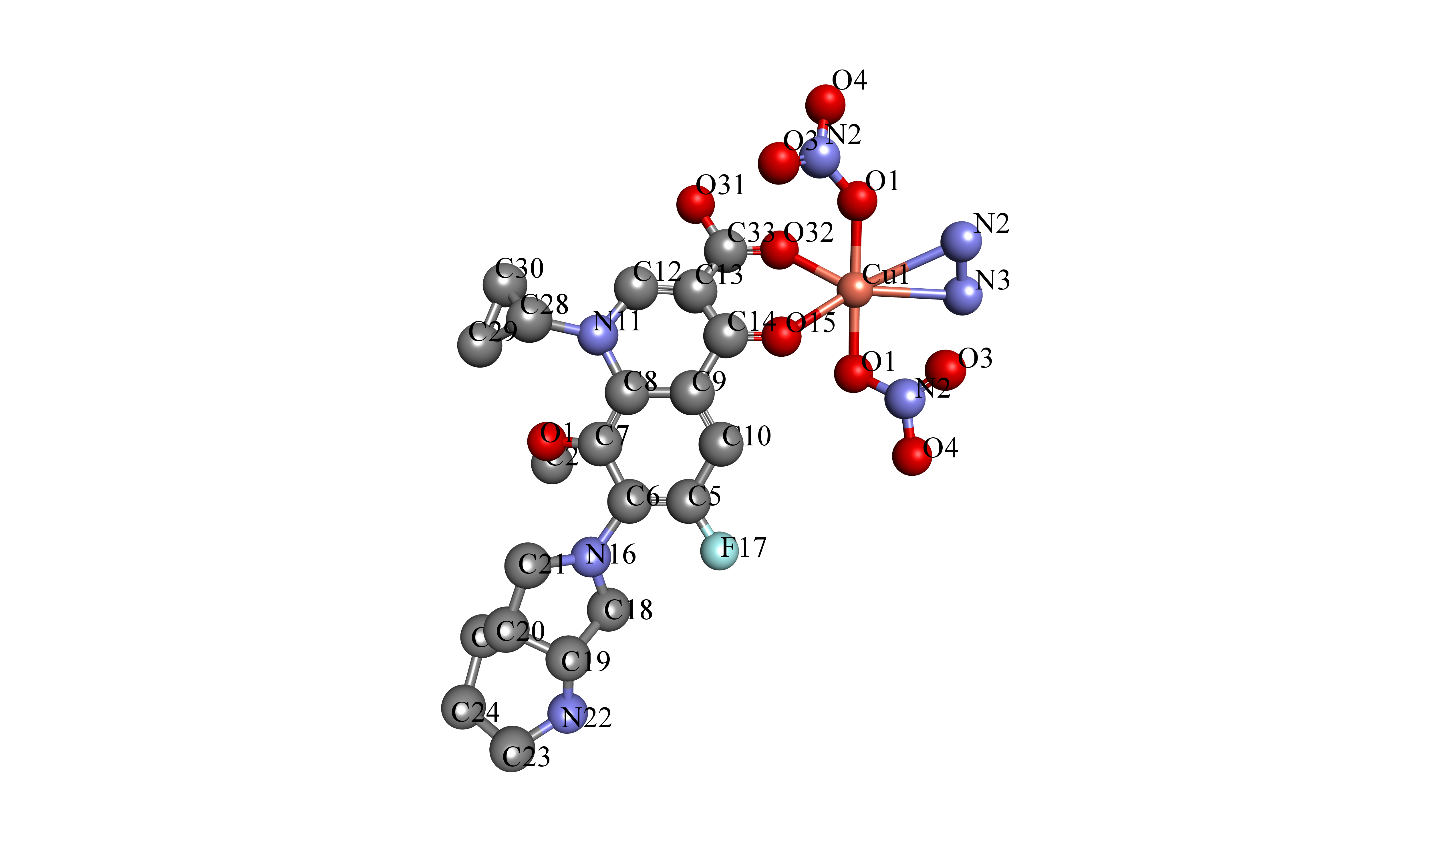


Figures S3f; Molecular structures with optimized geometry for complex 6

(The hydrogen atoms are omitted for simplicity)
